# Supplementary material
Source: MDPI journal article supplement (https://www.mdpi.com/2504-446X/6/10/299)
Supplement: s1 [file s1]

Archive with 1 entries (1 files):
- drones-1942298-supplementary.pdf
